# Supplementary material for: Expanded PCR Panel Testing for Identification of Respiratory Pathogens and Coinfections in Influenza-like Illness
Source: MDPI journal article supplement (doi:10.3390/diagnostics13122014), 2023-06-09
Supplement: s1 [file s1]

## Supplemental Tables

|                            | TAC                   |                    | OA                    |                    |
|----------------------------|-----------------------|--------------------|-----------------------|--------------------|
| Number of positive targets | # of positive samples | % of total samples | # of positive samples | % of total samples |
| 0                          | 158                   | 41.47%             | 164                   | 43.04%             |
| 1                          | 133                   | 34.91%             | 138                   | 36.22%             |
| 2                          | 76                    | 19.95%             | 66                    | 17.32%             |
| 3                          | 13                    | 3.41%              | 13                    | 3.41%              |
| 4                          | 1                     | 0.26%              | 0                     | 0%                 |
| Total                      | 381                   | 100.00%            | 381                   | 100.00%            |

**Table S1:** Number of positive samples and positivity rate for one, two, three or four organisms from samples tested with the TAC platform.

|                               | TAC                   |                                             | OA                    |                                             |
|-------------------------------|-----------------------|---------------------------------------------|-----------------------|---------------------------------------------|
| Positive targets              | # of positive samples | Relative prevalence (%) among all positives | # of positive samples | Relative prevalence (%) among all positives |
| Staphylococcus aureus         | 96                    | 29.3%                                       | 97                    | 31.2%                                       |
| SARS-CoV-2                    | 78                    | 23.8%                                       | 78                    | 25.1%                                       |
| Rhinovirus                    | 47                    | 14.3%                                       | 50                    | 16.1%                                       |
| Human Herpesvirus 6           | 30                    | 9.1%                                        | 30                    | 9.6%                                        |
| Moraxella catarrhalis         | 18                    | 5.5%                                        | N/A                   | N/A                                         |
| Haemophilus influenzae        | 10                    | 3.0%                                        | 10                    | 3.2%                                        |
| Human Herpesvirus 4-EBV       | 9                     | 2.7%                                        | 9                     | 2.9%                                        |
| Klebsiella pneumoniae         | 8                     | 2.4%                                        | 8                     | 2.6%                                        |
| Enterovirus Pan               | 6                     | 1.8%                                        | 6                     | 1.9%                                        |
| Coronavirus NL63              | 5                     | 1.5%                                        | 5                     | 1.6%                                        |
| Coronavirus OC43              | 5                     | 1.5%                                        | 5                     | 1.6%                                        |
| Streptococcus pneumoniae      | 4                     | 1.2%                                        | 4                     | 1.3%                                        |
| Coronavirus 229E              | 2                     | 0.6%                                        | 2                     | 0.6%                                        |
| Human Herpesvirus 5-CMV       | 2                     | 0.6%                                        | 2                     | 0.6%                                        |
| Parainfluenza virus 3         | 2                     | 0.6%                                        | 2                     | 0.6%                                        |
| Pneumocystis jirovecii        | 2                     | 0.6%                                        | N/A                   | N/A                                         |
| Enterovirus D68               | 1                     | 0.3%                                        | 1                     | 0.3%                                        |
| Metapneumovirus (hMPV)        | 1                     | 0.3%                                        | 0                     | 0.0%                                        |
| Parainfluenza virus 2         | 1                     | 0.3%                                        | 1                     | 0.3%                                        |
| Respiratory Syncytial Virus B | 1                     | 0.3%                                        | 1                     | 0.3%                                        |

**Table S2:** Number of positive samples and relative prevalence of organisms identified using the TAC or OA platform among all positive specimens. (N/A : Not applicable because *Moraxella catarrhalis* and *Pneumocystis jirovecii* were included on TAC but not tested on OA)

|                               | TAC                   |                                                              | OA                    |                                                              |
|-------------------------------|-----------------------|--------------------------------------------------------------|-----------------------|--------------------------------------------------------------|
| Positive targets              | # of positive samples | Relative prevalence (%) among specimen positive for 1 target | # of positive samples | Relative prevalence (%) among specimen positive for 1 target |
| Staphylococcus aureus         | 41                    | 31%                                                          | 47                    | 34%                                                          |
| SARS-CoV-2                    | 38                    | 29%                                                          | 40                    | 29%                                                          |
| Rhinovirus                    | 24                    | 18%                                                          | 25                    | 18%                                                          |
| Human Herpesvirus 6           | 9                     | 7%                                                           | 9                     | 7%                                                           |
| Moraxella catarrhalis         | 5                     | 4%                                                           | N/A                   | N/A                                                          |
| Coronavirus NL63              | 4                     | 3%                                                           | 4                     | 3%                                                           |
| Coronavirus 229E              | 2                     | 2%                                                           | 2                     | 1%                                                           |
| Coronavirus OC43              | 2                     | 2%                                                           | 2                     | 1%                                                           |
| Human Herpesvirus 4-EBV       | 2                     | 2%                                                           | 2                     | 1%                                                           |
| Klebsiella pneumoniae         | 2                     | 2%                                                           | 3                     | 2%                                                           |
| Haemophilus influenzae        | 1                     | 1%                                                           | 1                     | 1%                                                           |
| Metapneumovirus (hMPV)        | 1                     | 1%                                                           | 0                     | 0%                                                           |
| Respiratory Syncytial Virus B | 1                     | 1%                                                           | 1                     | 1%                                                           |
| Streptococcus pneumoniae      | 1                     | 1%                                                           | 1                     | 1%                                                           |
| <b>Total</b>                  | <b>133</b>            | <b>100%</b>                                                  | <b>137</b>            | <b>100%</b>                                                  |

**Table S3:** Number of positive samples and relative prevalence of organisms identified using the TAC or OA platform among specimens that tested positive for only 1 target. (N/A : Not applicable because *Moraxella catarrhalis* was included on TAC but not tested on OA)

|                                                 | TAC                   |                                                               | OA                    |                                                               |
|-------------------------------------------------|-----------------------|---------------------------------------------------------------|-----------------------|---------------------------------------------------------------|
| Positive targets                                | # of positive samples | Relative prevalence (%) among specimen positive for 2 targets | # of positive samples | Relative prevalence (%) among specimen positive for 2 targets |
| SARS-CoV-2 / S. aureus                          | 22                    | 29%                                                           | 21                    | 32%                                                           |
| Rhinovirus/Staphylococcus aureus                | 9                     | 12%                                                           | 9                     | 14%                                                           |
| Human Herpesvirus 6/SARS-CoV-2                  | 6                     | 8%                                                            | 6                     | 9%                                                            |
| Human Herpesvirus 6/Staphylococcus aureus       | 5                     | 7%                                                            | 5                     | 8%                                                            |
| Moraxella catarrhalis/Staphylococcus aureus     | 4                     | 5%                                                            | ND                    | ND                                                            |
| Enterovirus Pan/Rhinovirus                      | 3                     | 4%                                                            | 3                     | 5%                                                            |
| Human Herpesvirus 6/Rhinovirus                  | 3                     | 4%                                                            | 3                     | 5%                                                            |
| Moraxella catarrhalis/SARS-CoV-2                | 3                     | 4%                                                            | N/A                   | N/A                                                           |
| Haemophilus influenzae/Staphylococcus aureus    | 2                     | 3%                                                            | 2                     | 3%                                                            |
| Klebsiella pneumoniae/Staphylococcus aureus     | 2                     | 3%                                                            | 2                     | 3%                                                            |
| Parainfluenza virus 3/Staphylococcus aureus     | 2                     | 3%                                                            | 2                     | 3%                                                            |
| Coronavirus OC43/Haemophilus influenzae         | 1                     | 1%                                                            | 1                     | 2%                                                            |
| Coronavirus OC43/Klebsiella pneumoniae          | 1                     | 1%                                                            | 1                     | 2%                                                            |
| Coronavirus OC43/Staphylococcus aureus          | 1                     | 1%                                                            | 1                     | 2%                                                            |
| Haemophilus influenzae/Human Herpesvirus 6      | 1                     | 1%                                                            | 1                     | 2%                                                            |
| Haemophilus influenzae/Rhinovirus               | 1                     | 1%                                                            | 1                     | 2%                                                            |
| Haemophilus influenzae/SARS-CoV-2               | 1                     | 1%                                                            | 2                     | 3%                                                            |
| Haemophilus influenzae/Streptococcus pneumoniae | 1                     | 1%                                                            | 1                     | 2%                                                            |
| Human Herpesvirus 4 (EBV)/Klebsiella pneumoniae | 1                     | 1%                                                            | 1                     | 2%                                                            |
| Human Herpesvirus 4 (EBV)/SARS-CoV-2            | 1                     | 1%                                                            | 1                     | 2%                                                            |
| Human Herpesvirus 5 (CMV)/Klebsiella pneumoniae | 1                     | 1%                                                            | ND                    | ND                                                            |
| Klebsiella pneumoniae/Moraxella catarrhalis     | 1                     | 1%                                                            | N/A                   | N/A                                                           |
| Moraxella catarrhalis/Parainfluenza virus 2     | 1                     | 1%                                                            | N/A                   | N/A                                                           |
| Moraxella catarrhalis/Rhinovirus                | 1                     | 1%                                                            | N/A                   | N/A                                                           |
| Pneumocystis jirovecii/Staphylococcus aureus    | 1                     | 1%                                                            | N/A                   | N/A                                                           |
| Rhinovirus/SARS-CoV-2                           | 1                     | 1%                                                            | 3                     | 5%                                                            |
| <b>Total</b>                                    | <b>76</b>             | <b>100%</b>                                                   | <b>66</b>             | <b>100%</b>                                                   |

**Table S4:** Number of positive samples and relative prevalence of organisms identified using the TAC or OA platform among specimens that tested positive for 2 targets. (ND: Not detected positive for both targets; N/A : Not applicable because *Moraxella catarrhalis* and *Pneumocystis jirovecii* were included on TAC but not tested on OA)

| Sample ID | Target 1                  | Target 2                  | Target 3                 | All 3 targets detected in TAC         | All 3 targets detected in OA |
|-----------|---------------------------|---------------------------|--------------------------|---------------------------------------|------------------------------|
| 1-302-194 | Enterovirus D68           | Enterovirus Pan           | Rhinovirus               | Yes                                   | Yes                          |
| 1-302-017 | Enterovirus Pan           | Human Herpesvirus 4 (EBV) | Rhinovirus               | Yes                                   | Yes                          |
| 1-302-160 | Human Herpesvirus 4 (EBV) | Human Herpesvirus 6       | SARS-CoV-2               | Yes                                   | Yes                          |
| 1-305-009 | Human Herpesvirus 5 (CMV) | Human Herpesvirus 6       | Staphylococcus aureus    | Yes                                   | Yes                          |
| 1-302-176 | Human Herpesvirus 6       | Rhinovirus                | Staphylococcus aureus    | Yes                                   | Yes                          |
| 1-302-184 | Coronavirus NL63          | SARS-CoV-2                | Staphylococcus aureus    | Yes                                   | Yes                          |
| 1-302-133 | Human Herpesvirus 4 (EBV) | SARS-CoV-2                | Staphylococcus aureus    | Yes                                   | Yes                          |
| 1-305-080 | Human Herpesvirus 6       | SARS-CoV-2                | Staphylococcus aureus    | Yes                                   | Yes                          |
| 1-302-098 | Haemophilus influenzae    | Human Herpesvirus 4 (EBV) | Streptococcus pneumoniae | Yes                                   | Yes                          |
| 1-302-143 | Enterovirus Pan           | Rhinovirus                | Streptococcus pneumoniae | Yes                                   | Yes                          |
| 1-302-242 | Human Herpesvirus 6       | Moraxella catarrhalis     | Staphylococcus aureus    | Yes                                   | N/A                          |
| 1-304-013 | Haemophilus influenzae    | Pneumocystis jirovecii    | SARS-CoV-2               | Yes                                   | N/A                          |
| 1-302-205 | Moraxella catarrhalis     | Rhinovirus                | SARS-CoV-2               | Yes                                   | N/A                          |
| 1-305-019 | Human Herpesvirus 5 (CMV) | Klebsiella pneumoniae     | Rhinovirus               | No                                    | Yes                          |
| 1-302-167 | Rhinovirus                | SARS-CoV-2                | Staphylococcus aureus    | No                                    | Yes                          |
| 1-302-109 | Human Herpesvirus 4-EBV   | Human Herpesvirus 6       | Staphylococcus aureus    | Yes but 4 total targets were detected | Yes                          |
| Total     |                           |                           |                          | 13                                    | 13                           |

**Table S5:** Types of organisms identified using the TAC or OA platform among specimens that tested positive for 3 targets. (N/A : Not applicable because *Moraxella catarrhalis* and *Pneumocystis jirovecii* were included on TAC but not tested on OA)

| Sample ID | Target 1                  | Target 2            | Target 3              | Target 4              |
|-----------|---------------------------|---------------------|-----------------------|-----------------------|
| 1-302-109 | Human Herpesvirus 4 (EBV) | Human Herpesvirus 6 | Moxarella catarrhalis | Staphylococcus aureus |

**Table S6:** Types of organisms identified using the TAC platform in the specimen that tested positive for 4 targets.

| Sample ID | Target 1                      | Target 2                     | Target 3 |
|-----------|-------------------------------|------------------------------|----------|
| 1-302-167 | Rhinovirus                    | SARS-CoV-2                   | CMV      |
| 1-305-019 | Rhinovirus                    | <i>Klebsiella pneumoniae</i> |          |
| 1-302-213 | Rhinovirus                    | <i>Staphylococcus aureus</i> |          |
| 1-305-057 | Rhinovirus                    | <i>Staphylococcus aureus</i> |          |
| 1-305-069 | EBV                           | <i>Klebsiella pneumoniae</i> |          |
| 1-302-137 | <i>Haemophilus influenzae</i> | Rhinovirus                   |          |
| 1-302-139 | Rhinovirus                    |                              |          |
| 1-305-040 | EBV                           | SARS-CoV-2                   |          |
| 1-305-010 | SARS-CoV-2                    |                              |          |
| 1-305-034 | EBV                           |                              |          |
| 1-305-100 | Human Herpesvirus 6           |                              |          |
| 1-301-008 | <i>Staphylococcus aureus</i>  |                              |          |
| 1-305-037 | <i>Staphylococcus aureus</i>  |                              |          |
| 1-305-047 | <i>Staphylococcus aureus</i>  |                              |          |
| 1-305-083 | <i>Staphylococcus aureus</i>  |                              |          |
| 1-305-086 | <i>Staphylococcus aureus</i>  |                              |          |
| 1-308-003 | <i>Staphylococcus aureus</i>  |                              |          |
| 1-302-069 | NEGATIVE                      |                              |          |
| 1-302-135 |                               |                              |          |
| 1-302-207 |                               |                              |          |
| 1-302-232 |                               |                              |          |
| 1-305-002 |                               |                              |          |
| 1-305-007 |                               |                              |          |
| 1-305-017 |                               |                              |          |
| 1-305-018 |                               |                              |          |
| 1-305-022 |                               |                              |          |
| 1-305-027 |                               |                              |          |
| 1-305-043 |                               |                              |          |
| 1-305-099 |                               |                              |          |

**Table S7:** Types of organisms identified using the TAC platform in the specimen collected from all individuals aged 60 and older



| Positive targets          | # of positive samples | Relative prevalence (%) among specimen positive for 2 targets |
|---------------------------|-----------------------|---------------------------------------------------------------|
| Staphylococcus aureus     | 8                     | 32%                                                           |
| Rhinovirus                | 6                     | 24%                                                           |
| SARS-CoV-2                | 3                     | 12%                                                           |
| Human Herpesvirus 4 (EBV) | 3                     | 12%                                                           |
| Klebsiella pneumoniae     | 2                     | 8%                                                            |
| Haemophilus influenzae    | 1                     | 4%                                                            |
| Human Herpesvirus 5 (CMV) | 1                     | 4%                                                            |

**Table S8:** Number of positive samples and relative prevalence of organisms identified using the TAC platform among specimens collected from individuals aged 60 and older
